# Supplementary material for: Effects of DISC1 on Alzheimer’s disease cell models assessed by iTRAQ proteomics analysis
Source: Oxford University Press journal article supplement (doi:10.1042/bsr20211150), 2022-01-01
Supplement: bsr-2021-1150_supp.pdf [file bsr-2021-1150_supp.pdf]

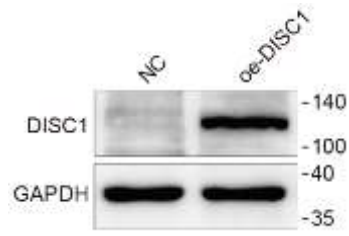

**Supplementary Figure. S1**

Western blot analysis of levels of DISC1 protein in HEK293-APP cells which were transfected with DISC1-overexpression (OE) or control lentiviruses (vector).

**Supplementary Table. S1 351 DEPs in model cells of AD over-expressing DISC1.**

| Protein ID | Gene symbol | Description                                                                                         | Mean ratio  |
|------------|-------------|-----------------------------------------------------------------------------------------------------|-------------|
| P60673     | PFN3        | Profilin-3                                                                                          | 2.663172018 |
| P62273     | RPS29       | 40S ribosomal protein S29                                                                           | 2.481425328 |
| Q9NRI5     | DISC1       | Disrupted in schizophrenia 1 protein                                                                | 2.175152568 |
| Q9UK76     | JPT1        | Jupiter microtubule associated homolog 1                                                            | 2.129304373 |
| D6RIA3     | C4orf54     | Uncharacterized protein C4orf54                                                                     | 1.976621657 |
| Q6P1L8     | MRPL14      | 39S ribosomal protein L14, mitochondrial                                                            | 1.946385443 |
| Q71DI3     | HIST2H3A    | Histone H3.2                                                                                        | 1.807106261 |
| P05160     | F13B        | Coagulation factor XIII B chain                                                                     | 1.656737482 |
| Q93077     | HIST1H2AC   | Histone H2A type 1-C                                                                                | 1.604556122 |
| Q8WXG1     | RSAD2       | Radical S-adenosyl methionine domain-containing protein 2                                           | 1.593975355 |
| P82921     | MRPS21      | 28S ribosomal protein S21, mitochondrial                                                            | 1.577483389 |
| O75037     | KIF21B      | Kinesin-like protein KIF21B                                                                         | 1.570883653 |
| Q9UK80     | USP21       | Ubiquitin carboxyl-terminal hydrolase 21                                                            | 1.566709143 |
| P52926     | HMGA2       | High mobility group protein HMGI-C                                                                  | 1.56653705  |
| Q9BY77     | POLDIP3     | Polymerase delta-interacting protein 3                                                              | 1.562567582 |
| Q9Y6C2     | EMILIN1     | EMILIN-1                                                                                            | 1.562523246 |
| O00488     | ZNF593      | Zinc finger protein 593                                                                             | 1.561342328 |
| Q9H446     | RWDD1       | RWD domain-containing protein 1                                                                     | 1.551293724 |
| Q9NW61     | PLEKHJ1     | Pleckstrin homology domain-containing family J member 1                                             | 1.544695272 |
| Q13442     | PDAP1       | 28 kDa heat- and acid-stable phosphoprotein                                                         | 1.542954482 |
| O95793     | STAU1       | Double-stranded RNA-binding protein Staufen homolog 1                                               | 1.52148379  |
| O14921     | RGS13       | Regulator of G-protein signaling 13                                                                 | 1.518755395 |
| P35637     | FUS         | RNA-binding protein FUS                                                                             | 1.51176635  |
| Q8WXE9     | STON2       | Stonin-2                                                                                            | 1.510145096 |
| P04908     | HIST1H2AB   | Histone H2A type 1-B/E                                                                              | 1.499748278 |
| Q9NZC9     | SMARCAL1    | SWI/SNF-related matrix-associated actin-dependent regulator of chromatin subfamily A-like protein 1 | 1.484634212 |
| P60866     | RPS20       | 40S ribosomal protein S20                                                                           | 1.471888769 |
| P62913     | RPL11       | 60S ribosomal protein L11                                                                           | 1.469239167 |
| O00311     | CDC7        | Cell division cycle 7-related protein kinase                                                        | 1.459651794 |
| Q99871     | HAUS7       | HAUS augmin-like complex subunit 7                                                                  | 1.452152209 |
| Q5VWW1     | C1QL3       | Complement C1q-like protein 3                                                                       | 1.429847408 |
| P84103     | SRSF3       | Serine/arginine-rich splicing factor 3                                                              | 1.425031204 |
| P09429     | HMGB1       | High mobility group protein B1                                                                      | 1.421077504 |
| P41223     | BUD31       | Protein BUD31 homolog                                                                               | 1.417104628 |
| Q9NZP6     | NPAP1       | Nuclear pore-associated protein 1                                                                   | 1.405854464 |
| Q02224     | CENPE       | Centromere-associated protein E                                                                     | 1.391536488 |
| Q5XPI4     | RNF123      | E3 ubiquitin-protein ligase RNF123                                                                  | 1.38593246  |
| Q9H492     | MAP1LC3A    | Microtubule-associated proteins 1A/1B light                                                         | 1.384994248 |

|        |           | chain 3A                                                 |             |
|--------|-----------|----------------------------------------------------------|-------------|
| Q9UKM9 | RALY      | RNA-binding protein Raly                                 | 1.379526179 |
| Q96DE0 | NUDT16    | U8 snoRNA-decapping enzyme                               | 1.378987515 |
| Q6FIF0 | ZFAND6    | AN1-type zinc finger protein 6                           | 1.377644089 |
| Q71UI9 | H2AFV     | Histone H2A.V                                            | 1.367391837 |
| P62263 | RPS14     | 40S ribosomal protein S14                                | 1.364455781 |
| Q9UNW9 | NOVA2     | RNA-binding protein Nova-2                               | 1.361265134 |
| P62633 | CNBP      | Cellular nucleic acid-binding protein                    | 1.358100889 |
| P38159 | RBMX      | RNA-binding motif protein, X chromosome                  | 1.358088598 |
| P84243 | H3F3A     | Histone H3.3                                             | 1.357848195 |
| P25685 | DNAJB1    | DnaJ homolog subfamily B member 1                        | 1.357253446 |
| P60002 | ELOF1     | Transcription elongation factor 1 homolog                | 1.357118803 |
| P62316 | SNRPD2    | Small nuclear ribonucleoprotein Sm D2                    | 1.350704621 |
| Q9NUL3 | STAU2     | Double-stranded RNA-binding protein Staufen homolog 2    | 1.350569347 |
| P45452 | MMP13     | Collagenase 3                                            | 1.348205049 |
| P26583 | HMGB2     | High mobility group protein B2                           | 1.347960919 |
| Q14493 | SLBP      | Histone RNA hairpin-binding protein                      | 1.339336978 |
| P62805 | HIST1H4A  | Histone H4                                               | 1.338675082 |
| P60981 | DSTN      | Destrin                                                  | 1.338360807 |
| Q14832 | GRM3      | Metabotropic glutamate receptor 3                        | 1.337731441 |
| Q9NW64 | RBM22     | Pre-mRNA-splicing factor RBM22                           | 1.33489686  |
| P30050 | RPL12     | 60S ribosomal protein L12                                | 1.327390437 |
| Q86TN4 | TRPT1     | tRNA 2'-phosphotransferase 1                             | 1.32606524  |
| Q9NXW9 | ALKBH4    | Alpha-ketoglutarate-dependent dioxygenase alkB homolog 4 | 1.325937978 |
| Q9NPG1 | FZD3      | Frizzled-3                                               | 1.322624257 |
| O75925 | PIAS1     | E3 SUMO-protein ligase PIAS1                             | 1.321503766 |
| Q01844 | EWSR1     | RNA-binding protein EWS                                  | 1.319601261 |
| Q53QV2 | LBH       | Protein LBH                                              | 1.318861536 |
| O75531 | BANF1     | Barrier-to-autointegration factor                        | 1.314593528 |
| Q00688 | FKBP3     | Peptidyl-prolyl cis-trans isomerase FKBP3                | 1.313956247 |
| Q6NXN4 | DPY19L2P1 | Putative C-mannosyltransferase DPY19L2P1                 | 1.310855929 |
| Q9H8W4 | PLEKHF2   | Pleckstrin homology domain-containing family F member 2  | 1.309976401 |
| P61077 | UBE2D3    | Ubiquitin-conjugating enzyme E2 D3                       | 1.305305759 |
| Q13393 | PLD1      | Phospholipase D1                                         | 1.304721135 |
| O14531 | DPYSL4    | Dihydropyrimidinase-related protein 4                    | 1.304654158 |
| Q9HC52 | CBX8      | Chromobox protein homolog 8                              | 1.304094296 |
| Q8NH81 | OR10G6    | Olfactory receptor 10G6                                  | 1.30345953  |
| Q9HBM6 | TAF9B     | Transcription initiation factor TFIID subunit 9B         | 1.302202026 |
| Q9NZP5 | OR5AC2    | Olfactory receptor 5AC2                                  | 1.298908529 |
| Q96EK6 | GNPNAT1   | Glucosamine 6-phosphate N-acetyltransferase              | 1.297054425 |
| P17096 | HMG1      | High mobility group protein HMG-I/HMG-Y                  | 1.290807567 |
| Q9NRR4 | DROSHA    | Ribonuclease 3                                           | 1.290265936 |
| O15061 | SYNM      | Synemin                                                  | 1.289195829 |
| Q9NXR1 | NDE1      | Nuclear distribution protein nudE homolog 1              | 1.288709326 |

|        |          |                                                                   |             |
|--------|----------|-------------------------------------------------------------------|-------------|
| P11940 | PABPC1   | Polyadenylate-binding protein 1                                   | 1.285071017 |
| Q7Z7K6 | CENPV    | Centromere protein V                                              | 1.283916595 |
| Q68CJ6 | NUGGC    | Nuclear GTPase SLIP-GC                                            | 1.283641361 |
| P18077 | RPL35A   | 60S ribosomal protein L35a                                        | 1.283026404 |
| Q96CT7 | CCDC124  | Coiled-coil domain-containing protein 124                         | 1.281811492 |
| P62318 | SNRPD3   | Small nuclear ribonucleoprotein Sm D3                             | 1.281563466 |
| Q96F86 | EDC3     | Enhancer of mRNA-decapping protein 3                              | 1.280314048 |
| Q5VV41 | ARHGEF16 | Rho guanine nucleotide exchange factor 16                         | 1.279495682 |
| Q9UN81 | L1RE1    | LINE-1 retrotransposable element ORF1 protein                     | 1.279078071 |
| O75937 | DNAJC8   | DnaJ homolog subfamily C member 8                                 | 1.275320043 |
| P61513 | RPL37A   | 60S ribosomal protein L37a                                        | 1.27469655  |
| Q96N11 | C7orf26  | Uncharacterized protein C7orf26                                   | 1.272927269 |
| P23193 | TCEA1    | Transcription elongation factor A protein 1                       | 1.266354628 |
| Q9UGN5 | PARP2    | Poly [ADP-ribose] polymerase 2                                    | 1.263690485 |
| P68371 | TUBB4B   | Tubulin beta-4B chain                                             | 1.263359478 |
| Q99729 | HNRNPAB  | Heterogeneous nuclear ribonucleoprotein A/B                       | 1.261724378 |
| Q4J6C6 | PREPL    | Prolyl endopeptidase-like                                         | 1.261697724 |
| Q96EY5 | MVB12A   | Multivesicular body subunit 12A                                   | 1.261182618 |
| Q9BRZ2 | TRIM56   | E3 ubiquitin-protein ligase TRIM56                                | 1.260905818 |
| Q8IYE0 | CCDC146  | Coiled-coil domain-containing protein 146                         | 1.260509627 |
| Q9H2C2 | ARV1     | Protein ARV1                                                      | 1.260370968 |
| Q562E7 | WDR81    | WD repeat-containing protein 81                                   | 1.260227986 |
| Q9H477 | RBKS     | Ribokinase                                                        | 1.260169904 |
| O15347 | HMGB3    | High mobility group protein B3                                    | 1.258228304 |
| Q9BWE0 | REPIN1   | Replication initiator 1                                           | 1.257249586 |
| P46783 | RPS10    | 40S ribosomal protein S10                                         | 1.256715091 |
| Q12980 | NPRL3    | GATOR complex protein NPRL3                                       | 1.255275227 |
| Q9Y3S2 | ZNF330   | Zinc finger protein 330                                           | 1.254775718 |
| Q9NZI7 | UBP1     | Upstream-binding protein 1                                        | 1.254692752 |
| Q9NXA8 | SIRT5    | NAD-dependent protein deacylase sirtuin-5, mitochondrial          | 1.253462074 |
| P07910 | HNRNPC   | Heterogeneous nuclear ribonucleoproteins C1/C2                    | 1.253406773 |
| Q8N653 | LZTR1    | Leucine-zipper-like transcriptional regulator 1                   | 1.253380617 |
| Q7Z7N9 | TMEM179B | Transmembrane protein 179B                                        | 1.253120454 |
| P36507 | MAP2K2   | Dual specificity mitogen-activated protein kinase kinase 2        | 1.252605327 |
| Q13268 | DHRS2    | Dehydrogenase/reductase SDR family member 2, mitochondrial        | 1.251813455 |
| P53999 | SUB1     | Activated RNA polymerase II transcriptional coactivator p15       | 1.248839311 |
| Q9H1E3 | NUCKS1   | Nuclear ubiquitous casein and cyclin-dependent kinase substrate 1 | 1.248676421 |
| Q9H788 | SH2D4A   | SH2 domain-containing protein 4A                                  | 1.247815744 |
| Q8IWC1 | MAP7D3   | MAP7 domain-containing protein 3                                  | 1.247372034 |
| P43115 | PTGER3   | Prostaglandin E2 receptor EP3 subtype                             | 1.246879059 |
| Q6ZN18 | AEBP2    | Zinc finger protein AEBP2                                         | 1.24648453  |
| Q8NI35 | PATJ     | InaD-like protein                                                 | 1.24623144  |
| Q9Y4F5 | CEP170B  | Centrosomal protein of 170 kDa protein B                          | 1.245492435 |

|        |           |                                                             |             |
|--------|-----------|-------------------------------------------------------------|-------------|
| Q8N128 | FAM177A1  | Protein FAM177A1                                            | 1.245199779 |
| Q7L4I2 | RSRC2     | Arginine/serine-rich coiled-coil protein 2                  | 1.244248862 |
| P07205 | PGK2      | Phosphoglycerate kinase 2                                   | 1.243494777 |
| Q13573 | SNW1      | SNW domain-containing protein 1                             | 1.242602105 |
| Q15678 | PTPN14    | Tyrosine-protein phosphatase non-receptor type 14           | 1.241718451 |
| Q9Y316 | MEMO1     | Protein MEMO1                                               | 1.241687677 |
| Q15398 | DLGAP5    | Disks large-associated protein 5                            | 1.241359914 |
| P29373 | CRABP2    | Cellular retinoic acid-binding protein 2                    | 1.239320246 |
| Q9BW85 | YJU2      | YJU2 splicing factor homolog                                | 1.238269443 |
| P48047 | ATP5O     | ATP synthase subunit O, mitochondrial                       | 1.23680797  |
| P46937 | YAP1      | Transcriptional coactivator YAP1                            | 1.236755164 |
| Q8TF05 | PPP4R1    | Serine/threonine-protein phosphatase 4 regulatory subunit 1 | 1.235827235 |
| P14174 | MIF       | Macrophage migration inhibitory factor                      | 1.235406376 |
| Q86YP4 | GATAD2A   | Transcriptional repressor p66-alpha                         | 1.234582282 |
| Q86V81 | ALYREF    | THO complex subunit 4                                       | 1.234053994 |
| P23528 | CFL1      | Cofilin-1                                                   | 1.233962302 |
| Q9NQ88 | TIGAR     | Fructose-2,6-bisphosphatase TIGAR                           | 1.233681399 |
| P62249 | RPS16     | 40S ribosomal protein S16                                   | 1.233594379 |
| Q8N257 | HIST3H2BB | Histone H2B type 3-B                                        | 1.23305659  |
| Q9BSD7 | NTPCR     | Cancer-related nucleoside-triphosphatase                    | 1.232872203 |
| Q00059 | TFAM      | Transcription factor A, mitochondrial                       | 1.232248125 |
| Q16775 | HAGH      | Hydroxyacylglutathione hydrolase, mitochondrial             | 1.231666132 |
| Q9UKY7 | CDV3      | Protein CDV3 homolog                                        | 1.23165581  |
| Q15785 | TOMM34    | Mitochondrial import receptor subunit TOM34                 | 1.230957984 |
| Q5JU85 | IQSEC2    | IQ motif and SEC7 domain-containing protein 2               | 1.229717616 |
| Q9NUQ6 | SPATS2L   | SPATS2-like protein                                         | 1.229699318 |
| P13693 | TPT1      | Translationally-controlled tumor protein                    | 1.228899859 |
| Q9BW83 | IFT27     | Intraflagellar transport protein 27 homolog                 | 1.227714854 |
| Q9NSI2 | FAM207A   | Protein FAM207A                                             | 1.226779957 |
| O75347 | TBCA      | Tubulin-specific chaperone A                                | 1.225323104 |
| Q9GZU8 | FAM192A   | Protein FAM192A                                             | 1.225214573 |
| Q8WXX5 | DNAJC9    | DnaJ homolog subfamily C member 9                           | 1.224468646 |
| Q14241 | ELOA      | Elongin-A                                                   | 1.22408387  |
| Q96RU3 | FNBP1     | Formin-binding protein 1                                    | 1.223685746 |
| Q92665 | MRPS31    | 28S ribosomal protein S31, mitochondrial                    | 1.22356098  |
| Q7Z7A3 | CTU1      | Cytoplasmic tRNA 2-thiolation protein 1                     | 1.222682175 |
| Q5U5X0 | LYRM7     | Complex III assembly factor LYRM7                           | 1.222460414 |
| Q86SX3 | TEDC1     | Tubulin epsilon and delta complex protein 1                 | 1.222402928 |
| Q9Y605 | MRFAP1    | MORF4 family-associated protein 1                           | 1.222054027 |
| P67809 | YBX1      | Nuclease-sensitive element-binding protein 1                | 1.221098797 |
| Q15056 | EIF4H     | Eukaryotic translation initiation factor 4H                 | 1.22035531  |
| P16104 | H2AFX     | Histone H2AX                                                | 1.220301231 |
| Q6P597 | KLC3      | Kinesin light chain 3                                       | 1.220071365 |
| O75438 | NDUFB1    | NADH dehydrogenase [ubiquinone] 1 beta subcomplex subunit 1 | 1.218323423 |

|        |          |                                                                     |             |
|--------|----------|---------------------------------------------------------------------|-------------|
| O43869 | OR2T1    | Olfactory receptor 2T1                                              | 1.217257355 |
| Q92890 | UFD1     | Ubiquitin recognition factor in ER-associated degradation protein 1 | 1.217034001 |
| P49914 | MTHFS    | 5-formyltetrahydrofolate cyclo-ligase                               | 1.21680543  |
| Q13310 | PABPC4   | Polyadenylate-binding protein 4                                     | 1.215944278 |
| P62979 | RPS27A   | Ubiquitin-40S ribosomal protein S27a                                | 1.215538359 |
| P39019 | RPS19    | 40S ribosomal protein S19                                           | 1.215411145 |
| P11217 | PYGM     | Glycogen phosphorylase, muscle form                                 | 1.215091025 |
| Q5T0J7 | TEX35    | Testis-expressed protein 35                                         | 1.214670339 |
| P17844 | DDX5     | Probable ATP-dependent RNA helicase DDX5                            | 1.214432238 |
| P62854 | RPS26    | 40S ribosomal protein S26                                           | 1.213852162 |
| P04350 | TUBB4A   | Tubulin beta-4A chain                                               | 1.21345528  |
| P52739 | ZNF131   | Zinc finger protein 131                                             | 1.213255521 |
| P0DP23 | CALM1    | Calmodulin-1                                                        | 1.212858704 |
| O95858 | TSPAN15  | Tetraspanin-15                                                      | 1.212515434 |
| P49321 | NASP     | Nuclear autoantigenic sperm protein                                 | 1.212290647 |
| Q92804 | TAF15    | TATA-binding protein-associated factor 2N                           | 1.212153376 |
| Q9UEW8 | STK39    | STE20/SPS1-related proline-alanine-rich protein kinase              | 1.211975842 |
| P37108 | SRP14    | Signal recognition particle 14 kDa protein                          | 1.211563615 |
| P11387 | TOP1     | DNA topoisomerase 1                                                 | 1.210311639 |
| Q8NC51 | SERBP1   | Plasminogen activator inhibitor 1 RNA-binding protein               | 1.210131801 |
| Q9NQ29 | LUC7L    | Putative RNA-binding protein Luc7-like 1                            | 1.209813614 |
| Q13185 | CBX3     | Chromobox protein homolog 3                                         | 1.209017436 |
| Q9UHA3 | RSL24D1  | Probable ribosome biogenesis protein RLP24                          | 1.208673628 |
| P61586 | RHOA     | Transforming protein RhoA                                           | 1.208087113 |
| P63173 | RPL38    | 60S ribosomal protein L38                                           | 1.207837288 |
| P31689 | DNAJA1   | DnaJ homolog subfamily A member 1                                   | 1.207619163 |
| Q8NDD1 | C1orf131 | Uncharacterized protein C1orf131                                    | 1.207311341 |
| Q8NEZ3 | WDR19    | WD repeat-containing protein 19                                     | 1.206519718 |
| Q13228 | SELENBP1 | Methanethiol oxidase                                                | 1.206085953 |
| Q15818 | NPTX1    | Neuronal pentraxin-1                                                | 1.205786198 |
| Q96C90 | PPP1R14B | Protein phosphatase 1 regulatory subunit 14B                        | 1.204824062 |
| Q8NEY1 | NAV1     | Neuron navigator 1                                                  | 1.204636013 |
| Q96F63 | CCDC97   | Coiled-coil domain-containing protein 97                            | 1.20449852  |
| O43252 | PAPSS1   | Bifunctional 3'-phosphoadenosine 5'-phosphosulfate synthase 1       | 1.204028572 |
| Q3T8J9 | GON4L    | GON-4-like protein                                                  | 1.203576735 |
| Q9H5V9 | CXorf56  | UPF0428 protein CXorf56                                             | 1.203145848 |
| O95817 | BAG3     | BAG family molecular chaperone regulator 3                          | 1.203083931 |
| Q16626 | MEA1     | Male-enhanced antigen 1                                             | 1.202481142 |
| Q9Y3B7 | MRPL11   | 39S ribosomal protein L11, mitochondrial                            | 1.202303557 |
| P39687 | ANP32A   | Acidic leucine-rich nuclear phosphoprotein 32 family member A       | 1.202219384 |
| Q9Y4P1 | ATG4B    | Cysteine protease ATG4B                                             | 1.202163735 |
| P02545 | LMNA     | Prelamin-A/C                                                        | 1.201932112 |
| O14979 | HNRNPDL  | Heterogeneous nuclear ribonucleoprotein D-like                      | 1.201834809 |

|        |         |                                                                              |             |
|--------|---------|------------------------------------------------------------------------------|-------------|
| P35269 | GTF2F1  | General transcription factor IIF subunit 1                                   | 1.201700967 |
| Q9NRG1 | PRTFDC1 | Phosphoribosyltransferase domain-containing protein 1                        | 1.201408167 |
| P62829 | RPL23   | 60S ribosomal protein L23                                                    | 1.201268576 |
| Q13885 | TUBB2A  | Tubulin beta-2A chain                                                        | 1.200466376 |
| Q66PJ3 | ARL6IP4 | ADP-ribosylation factor-like protein 6-interacting protein 4                 | 1.200172608 |
| Q3ZAQ7 | VMA21   | Vacuolar ATPase assembly integral membrane protein VMA21                     | 0.832782621 |
| Q9BUM1 | G6PC3   | Glucose-6-phosphatase 3                                                      | 0.832725967 |
| O94923 | GLCE    | D-glucuronyl C5-epimerase                                                    | 0.832186111 |
| Q7Z5Q5 | POLN    | DNA polymerase nu                                                            | 0.831617641 |
| P20742 | PZP     | Pregnancy zone protein                                                       | 0.83152963  |
| Q96RD7 | PANX1   | Pannexin-1                                                                   | 0.831370269 |
| Q8TE02 | ELP5    | Elongator complex protein 5                                                  | 0.831121022 |
| Q7L3T8 | PARS2   | Probable proline--tRNA ligase, mitochondrial                                 | 0.8310823   |
| P46977 | STT3A   | Dolichyl-diphosphooligosaccharide--protein glycosyltransferase subunit STT3A | 0.830559413 |
| P78540 | ARG2    | Arginase-2, mitochondrial                                                    | 0.830279359 |
| Q9H9S5 | FKRP    | Fukutin-related protein                                                      | 0.830261536 |
| P00846 | MT-ATP6 | ATP synthase subunit a                                                       | 0.829722048 |
| Q9H3Z4 | DNAJC5  | DnaJ homolog subfamily C member 5                                            | 0.829547542 |
| Q96E22 | NUS1    | Dehydrodolichyl diphosphate synthase complex subunit NUS1                    | 0.829483844 |
| O43915 | VEGFD   | Vascular endothelial growth factor D                                         | 0.828244645 |
| Q9BRT2 | UQCC2   | Ubiquinol-cytochrome-c reductase complex assembly factor 2                   | 0.827465918 |
| Q9H5Q4 | TFB2M   | Dimethyladenosine transferase 2, mitochondrial                               | 0.827235437 |
| Q8NFV4 | ABHD11  | Protein ABHD11                                                               | 0.826893135 |
| Q86W28 | NLRP8   | NACHT, LRR and PYD domains-containing protein 8                              | 0.826277232 |
| Q9P0S3 | ORMDL1  | ORM1-like protein 1                                                          | 0.826062828 |
| Q14118 | DAG1    | Dystroglycan                                                                 | 0.825977351 |
| Q9NXN4 | GDAP2   | Ganglioside-induced differentiation-associated protein 2                     | 0.825404298 |
| Q5BJH2 | TMEM128 | Transmembrane protein 128                                                    | 0.824934367 |
| Q92609 | TBC1D5  | TBC1 domain family member 5                                                  | 0.823697208 |
| Q5BJF2 | TMEM97  | Sigma intracellular receptor 2                                               | 0.823311651 |
| P43003 | SLC1A3  | Excitatory amino acid transporter 1                                          | 0.823250869 |
| P56282 | POLE2   | DNA polymerase epsilon subunit 2                                             | 0.823130724 |
| Q8WV93 | AFG1L   | AFG1-like ATPase                                                             | 0.823080349 |
| P09493 | TPM1    | Tropomyosin alpha-1 chain                                                    | 0.823067091 |
| Q15051 | IQCB1   | IQ calmodulin-binding motif-containing protein 1                             | 0.82273043  |
| Q9H553 | ALG2    | Alpha-1,3/1,6-mannosyltransferase ALG2                                       | 0.821977555 |
| Q15904 | ATP6AP1 | V-type proton ATPase subunit S1                                              | 0.821957119 |
| Q8WV99 | ZFAND2B | AN1-type zinc finger protein 2B                                              | 0.821795463 |
| O00767 | SCD     | Acyl-CoA desaturase                                                          | 0.818973335 |
| Q14728 | MFSD10  | Major facilitator superfamily domain-containing protein 10                   | 0.818263868 |

|        |          |                                                                                |             |
|--------|----------|--------------------------------------------------------------------------------|-------------|
| O43657 | TSPAN6   | Tetraspanin-6                                                                  | 0.817291474 |
| P42262 | GRIA2    | Glutamate receptor 2                                                           | 0.817046231 |
| Q9UIS9 | MBD1     | Methyl-CpG-binding domain protein 1                                            | 0.816872887 |
| Q9UFH2 | DNAH17   | Dynein heavy chain 17, axonemal                                                | 0.815786939 |
| Q96GJ1 | TRMT2B   | tRNA (uracil(54)-C(5))-methyltransferase homolog                               | 0.814785738 |
| Q07075 | ENPEP    | Glutamyl aminopeptidase                                                        | 0.814424154 |
| Q9H9H4 | VPS37B   | Vacuolar protein sorting-associated protein 37B                                | 0.813843603 |
| P61803 | DAD1     | Dolichyl-diphosphooligosaccharide--protein glycosyltransferase subunit DAD1    | 0.813294932 |
| Q7Z3Z4 | PIWIL4   | Piwi-like protein 4                                                            | 0.812560233 |
| Q8NHP8 | PLBD2    | Putative phospholipase B-like 2                                                | 0.812152256 |
| Q8N2K0 | ABHD12   | Monoacylglycerol lipase ABHD12                                                 | 0.812047838 |
| P07996 | THBS1    | Thrombospondin-1                                                               | 0.811844003 |
| O75449 | KATNA1   | Katanin p60 ATPase-containing subunit A1                                       | 0.811064652 |
| Q12770 | SCAP     | Sterol regulatory element-binding protein cleavage-activating protein          | 0.811015248 |
| Q9P2W1 | PSMC3IP  | Homologous-pairing protein 2 homolog                                           | 0.810824422 |
| O00584 | RNASET2  | Ribonuclease T2                                                                | 0.810520464 |
| Q9NRM1 | ENAM     | Enamelin                                                                       | 0.810374692 |
| P56134 | ATP5J2   | ATP synthase subunit f, mitochondrial                                          | 0.809812941 |
| Q69YH5 | CDCA2    | Cell division cycle-associated protein 2                                       | 0.809240805 |
| Q15118 | PDK1     | [Pyruvate dehydrogenase (acetyl-transferring)] kinase isozyme 1, mitochondrial | 0.807523833 |
| P18085 | ARF4     | ADP-ribosylation factor 4                                                      | 0.807086646 |
| Q5JSL3 | DOCK11   | Dedicator of cytokinesis protein 11                                            | 0.805761678 |
| Q14108 | SCARB2   | Lysosome membrane protein 2                                                    | 0.804760212 |
| Q9H6K4 | OPA3     | Optic atrophy 3 protein                                                        | 0.804190461 |
| Q9Y221 | NIP7     | 60S ribosome subunit biogenesis protein NIP7 homolog                           | 0.803863387 |
| Q9H2D1 | SLC25A32 | Mitochondrial folate transporter/carrier                                       | 0.803467367 |
| Q86TJ2 | TADA2B   | Transcriptional adapter 2-beta                                                 | 0.803350941 |
| P12645 | BMP3     | Bone morphogenetic protein 3                                                   | 0.802466945 |
| Q8WTV0 | SCARB1   | Scavenger receptor class B member 1                                            | 0.801482955 |
| Q9Y6K0 | CEPT1    | Choline/ethanolaminephosphotransferase 1                                       | 0.801353643 |
| P12235 | SLC25A4  | ADP/ATP translocase 1                                                          | 0.79831037  |
| Q16563 | SYPL1    | Synaptophysin-like protein 1                                                   | 0.798075113 |
| P13645 | KRT10    | Keratin, type I cytoskeletal 10                                                | 0.797779412 |
| Q9Y3E0 | GOLT1B   | Vesicle transport protein GOT1B                                                | 0.797708279 |
| P02549 | SPTA1    | Spectrin alpha chain, erythrocytic 1                                           | 0.797692713 |
| O43861 | ATP9B    | Probable phospholipid-transporting ATPase IIB                                  | 0.797331906 |
| Q8IZ40 | RCOR2    | REST corepressor 2                                                             | 0.797242036 |
| Q99640 | PKMYT1   | Membrane-associated tyrosine- and threonine-specific cdc2-inhibitory kinase    | 0.797195019 |
| Q8N3A8 | PARP8    | Poly [ADP-ribose] polymerase 8                                                 | 0.797117318 |
| Q9Y5B6 | PAXBP1   | PAX3- and PAX7-binding protein 1                                               | 0.795897418 |
| Q8IV08 | PLD3     | Phospholipase D3                                                               | 0.793494531 |
| P32926 | DSG3     | Desmoglein-3                                                                   | 0.792615884 |



|        |          |                                                               |             |
|--------|----------|---------------------------------------------------------------|-------------|
| Q9Y3C1 | NOP16    | Nucleolar protein 16                                          | 0.78827528  |
| Q9H3U5 | MFSD1    | Major facilitator superfamily domain-containing protein 1     | 0.787879985 |
| P18440 | NAT1     | Arylamine N-acetyltransferase 1                               | 0.787215966 |
| Q0P6H9 | TMEM62   | Transmembrane protein 62                                      | 0.787004516 |
| Q6IE37 | OVOS1    | Ovostatin homolog 1                                           | 0.785739729 |
| P14854 | COX6B1   | Cytochrome c oxidase subunit 6B1                              | 0.78573252  |
| Q7LGC8 | CHST3    | Carbohydrate sulfotransferase 3                               | 0.785139337 |
| Q9UIU6 | SIX4     | Homeobox protein SIX4                                         | 0.785034589 |
| Q8NF50 | DOCK8    | Dedicator of cytokinesis protein 8                            | 0.783660065 |
| P35527 | KRT9     | Keratin, type I cytoskeletal 9                                | 0.777007683 |
| Q9NVV0 | TMEM38B  | Trimeric intracellular cation channel type B                  | 0.776968774 |
| Q8WV60 | PTCD2    | Pentatricopeptide repeat-containing protein 2, mitochondrial  | 0.774537651 |
| P55160 | NCKAP1L  | Nck-associated protein 1-like                                 | 0.769948494 |
| A6NJI9 | LRRC72   | Leucine-rich repeat-containing protein 72                     | 0.769321389 |
| Q96E29 | MTERF3   | Transcription termination factor 3, mitochondrial             | 0.7684804   |
| Q14703 | MBTPS1   | Membrane-bound transcription factor site-1 protease           | 0.764019643 |
| Q8WV22 | NSMCE1   | Non-structural maintenance of chromosomes element 1 homolog   | 0.762571266 |
| P02533 | KRT14    | Keratin, type I cytoskeletal 14                               | 0.762261094 |
| Q99683 | MAP3K5   | Mitogen-activated protein kinase kinase kinase 5              | 0.760636019 |
| Q8N2E2 | VWDE     | von Willebrand factor D and EGF domain-containing protein     | 0.75919479  |
| Q658P3 | STEAP3   | Metalloreductase STEAP3                                       | 0.754495043 |
| Q9NR77 | PXMP2    | Peroxisomal membrane protein 2                                | 0.75430007  |
| Q9H061 | TMEM126A | Transmembrane protein 126A                                    | 0.753290141 |
| A2RU67 | FAM234B  | Protein FAM234B                                               | 0.751353893 |
| Q9Y5L4 | TIMM13   | Mitochondrial import inner membrane translocase subunit Tim13 | 0.746474784 |
| O75385 | ULK1     | Serine/threonine-protein kinase ULK1                          | 0.742344796 |
| Q9BY50 | SEC11C   | Signal peptidase complex catalytic subunit SEC11C             | 0.740168839 |
| P02042 | HBD      | Hemoglobin subunit delta                                      | 0.738533281 |
| Q14534 | SQLE     | Squalene monooxygenase                                        | 0.738456958 |
| P30536 | TSPO     | Translocator protein                                          | 0.734624502 |
| Q9P2K6 | KLHL42   | Kelch-like protein 42                                         | 0.733512268 |
| P02768 | ALB      | Serum albumin                                                 | 0.731421853 |
| Q4W5G0 | TIGD2    | Tigger transposable element-derived protein 2                 | 0.729096849 |
| Q6UX72 | B3GNT9   | UDP-GlcNAc:betaGal beta-1,3-N-acetylglucosaminyltransferase 9 | 0.716845933 |
| Q96BM9 | ARL8A    | ADP-ribosylation factor-like protein 8A                       | 0.715510626 |
| P57057 | SLC37A1  | Glucose-6-phosphate exchanger SLC37A1                         | 0.713464264 |
| Q9UJX2 | CDC23    | Cell division cycle protein 23 homolog                        | 0.710770783 |
| O15050 | TRANK1   | TPR and ankyrin repeat-containing protein 1                   | 0.708247483 |
| Q02413 | DSG1     | Desmoglein-1                                                  | 0.707750707 |
| P28330 | ACADL    | Long-chain specific acyl-CoA dehydrogenase, mitochondrial     | 0.707497167 |

---

|        |         |                                                |             |
|--------|---------|------------------------------------------------|-------------|
| P80365 | HSD11B2 | Corticosteroid 11-beta-dehydrogenase isozyme 2 | 0.700629987 |
| Q9P003 | CNIH4   | Protein cornichon homolog 4                    | 0.696978494 |
| Q92564 | DCUN1D4 | DCN1-like protein 4                            | 0.691796699 |
| Q9NX00 | TMEM160 | Transmembrane protein 160                      | 0.685147795 |
| Q96EU6 | RRP36   | Ribosomal RNA processing protein 36 homolog    | 0.680711277 |
| P78332 | RBM6    | RNA-binding protein 6                          | 0.656667186 |
| P04264 | KRT1    | Keratin, type II cytoskeletal 1                | 0.656660409 |
| P21860 | ERBB3   | Receptor tyrosine-protein kinase erbB-3        | 0.643736939 |
| P08779 | KRT16   | Keratin, type I cytoskeletal 16                | 0.633121401 |
| Q5HY64 | FAM47C  | Putative protein FAM47C                        | 0.625502861 |
| P13647 | KRT5    | Keratin, type II cytoskeletal 5                | 0.611197075 |
| P51786 | ZNF157  | Zinc finger protein 157                        | 0.586087661 |
| P48668 | KRT6C   | Keratin, type II cytoskeletal 6C               | 0.56390028  |
| Q92858 | ATOH1   | Protein atonal homolog 1                       | 0.561748688 |
| Q9UL62 | TRPC5   | Short transient receptor potential channel 5   | 0.560397651 |
| P78369 | CLDN10  | Claudin-10                                     | 0.553699125 |
| Q9H8M5 | CNNM2   | Metal transporter CNNM2                        | 0.537252179 |
| O95674 | CDS2    | Phosphatidate cytidyltransferase 2             | 0.490415498 |

---
